# Supplementary material
Source: PubMed Central journal article supplement (PMC2936071)
Supplement: jc.2009-2502_1.pdf [file jc.2009-2502_1.pdf]

**Supplemental Table 1. Baseline characteristics of subjects**

| Subject          | Age (yrs) | BMI (kg/m <sup>2</sup> ) | Body Fat (%) <sup>&amp;</sup> | Waist Circ. (cm) | Waist-Hip-Ratio | HOMA-IR | CD4 (cells/uL) | ART Regimen                    |
|------------------|-----------|--------------------------|-------------------------------|------------------|-----------------|---------|----------------|--------------------------------|
| 1                | 52        | 29.0                     | 32.2                          | 104.5            | 1.03            | 8.58    | 826            | nvp, 3tc, tdf                  |
| 2                | 40        | 28.3                     | 38.4                          | 107.1            | 1.04            | 9.58    | 440            | atz, rtv, azt, 3tc, abc        |
| 3                | 65        | 24.8                     | 21.4                          | 100.5            | 1.08            | 3.28    | 700            | efv, 3tc, abc                  |
| 4                | 34        | 29.3                     | 30.8                          | 107.2            | 1.08            | 4.35    | 459            | nfv, d4t, ddI                  |
| 5                | 69        | 24.0                     | 25.0                          | 106.8            | 1.17            | 6.93    | 427            | nvp, azt, 3tc, abc, tdf        |
| 6* <sup>#</sup>  | 57        | 28.8                     | 31.2                          | 109.3            | 1.13            | 9.70    | 827            | atz, rtv, tdf, ftc             |
| 7                | 49        | 26.1                     | 30.5                          | 105.1            | 1.10            | 4.84    | 295            | atz, rtv, azt, 3tc, tdf, ddi   |
| 8*               | 58        | 24.8                     | 16.0                          | 112.1            | 1.16            | 3.77    | 189            | lop/r, sqv, azt, 3tc, tdf, T20 |
| 9 <sup>#</sup>   | 61        | 30.0                     | 28.9                          | 108.2            | 1.10            | 3.73    | 565            | atz, 3tc, abc                  |
| 10* <sup>#</sup> | 50        | 29.6                     | 26.3                          | 114.4            | 1.14            | 5.00    | 324            | nvp, 3tc, abc, tdf             |
| 11* <sup>#</sup> | 55        | 29.2                     | 34.4                          | 117.7            | 1.19            | 5.66    | 414            | lpv/r, 3tc, tdf                |
| 12 <sup>#</sup>  | 52        | 25.1                     | 25.4                          | 110.5            | 1.11            | 2.85    | 499            | efv, azt, 3tc                  |
| 13               | 48        | 30.6                     | 39.1                          | 112.3            | 0.99            | 8.21    | 378            | ftc, tdf, efv                  |

3tc, lamivudine; abc, abacavir; atz, atazanavir; azt, zidovudine; d4t, stavudine; ddi, didanosine; efv, efavirenz; ftc, emtricitabine; lop/r, lopinavir/ritonavir; nfv, nelfinavir; nvp, nevirapine; rtv, ritonavir; sqv, saquinavir; tdf, tenofovir; T20, enfuvirtide

\* Subjects on testosterone replacement

<sup>#</sup> Subjects on lipid lowering medications

<sup>&</sup>Percent total body fat determined by DEXA
